# Supplementary material for: Secretome-Based Identification of ULBP2 as a Novel Serum Marker for Pancreatic Cancer Detection
Source: PLOS journal article supplement (doi:10.1371/journal.pone.0020029), 2011-05-20
Supplement: S8 (10.1371/journal.pone.0020029.s008) [file journal.pone.0020029.s008]

Supporting Table S4. Correlation between clinicopathological features and ULBP2 expression in tissue sections from 67 pancreatic cancer patients

| Characteristics                              | Patient No. | IHC score<br>(Mean $\pm$ SD) <sup>a</sup> | <i>p</i> -value    |
|----------------------------------------------|-------------|-------------------------------------------|--------------------|
| Gender                                       |             |                                           |                    |
| Male                                         | 44          | 2.64 $\pm$ 0.54                           | 0.180 <sup>b</sup> |
| Female                                       | 23          | 2.83 $\pm$ 0.36                           |                    |
| Age (years)                                  |             |                                           |                    |
| < 64 <sup>c</sup>                            | 33          | 2.61 $\pm$ 0.55                           | 0.089 <sup>b</sup> |
| $\geq$ 64                                    | 34          | 2.80 $\pm$ 0.41                           |                    |
| Histological grade <sup>d</sup>              |             |                                           |                    |
| Well differentiation                         | 23          | 2.71 $\pm$ 0.59                           | 0.746 <sup>e</sup> |
| Moderate differentiation                     | 31          | 2.68 $\pm$ 0.44                           |                    |
| Poor differentiation                         | 10          | 2.70 $\pm$ 0.48                           |                    |
| Overall stage                                |             |                                           |                    |
| stage I                                      | 9           | 2.52 $\pm$ 0.82                           | 0.593 <sup>e</sup> |
| stage II                                     | 56          | 2.73 $\pm$ 0.43                           |                    |
| stage IV                                     | 2           | 3.00 $\pm$ 0.00                           |                    |
| Tumor-node-metastasis (TNM)-T classification |             |                                           |                    |
| TNM-T2                                       | 9           | 2.52 $\pm$ 0.82                           | 0.653 <sup>b</sup> |
| TNM-T3                                       | 58          | 2.74 $\pm$ 0.42                           |                    |
| TNM-N classification                         |             |                                           |                    |
| TNM-N0                                       | 25          | 2.69 $\pm$ 0.59                           | 0.806 <sup>b</sup> |
| TNM-N1                                       | 42          | 2.72 $\pm$ 0.43                           |                    |
| TNM-M classification                         |             |                                           |                    |
| No metastasis                                | 65          | 2.70 $\pm$ 0.50                           | 0.479 <sup>b</sup> |
| Distant metastasis                           | 2           | 3.00 $\pm$ 0.00                           |                    |

<sup>a</sup> Intensity and percentage scores of cell staining were multiplied and then divided by 3 to get the IHC scores.

<sup>b</sup> The *p*-values were determined using Wilcoxon test.

<sup>c</sup> Median.

<sup>d</sup> Histological grade information not available in 3 patients.

<sup>e</sup> The *p*-values were determined using Kruskal-Wallis test.
